# Supplementary material for: Loss of Mob1a/b impairs the differentiation of mouse embryonic stem cells into the three germ layer lineages
Source: PubMed Central journal article supplement (PMC6853965; doi:10.1038/s12276-019-0342-z), 2019-11-14
Supplement: 12276_2019_342_MOESM1_ESM.pdf [file 12276_2019_342_MOESM1_ESM.pdf]

## Supplementary information

### **Loss of Mob1a/b impairs the differentiation of mouse embryonic stem cells into the three germ layer lineages.**

June Sung Bae<sup>1</sup>, Sun Mi Kim<sup>2</sup>, Yoon Jeon<sup>1</sup>, Juyeon Sim<sup>1</sup>, Ji Yun Jang<sup>1</sup>, Jaehyung Son<sup>2</sup>, Woosol Hong<sup>2</sup>,  
Mi Kyung Park<sup>2</sup> and Ho Lee<sup>1,2</sup>

<sup>1</sup> Research Institute, <sup>2</sup> Graduate School of Cancer Science and Policy, National Cancer Center, Goyang,  
Gyeonggi 10408, Republic of Korea

Correspondence to:

**Ho Lee, PhD.** Graduate School of Cancer Science and Policy, National Cancer Center, Gyeonggi  
10408, Republic of Korea, Phone +82-31-920-2274, Fax +82-31-920-2279, E-mail:ho25lee@ncc.re.kr

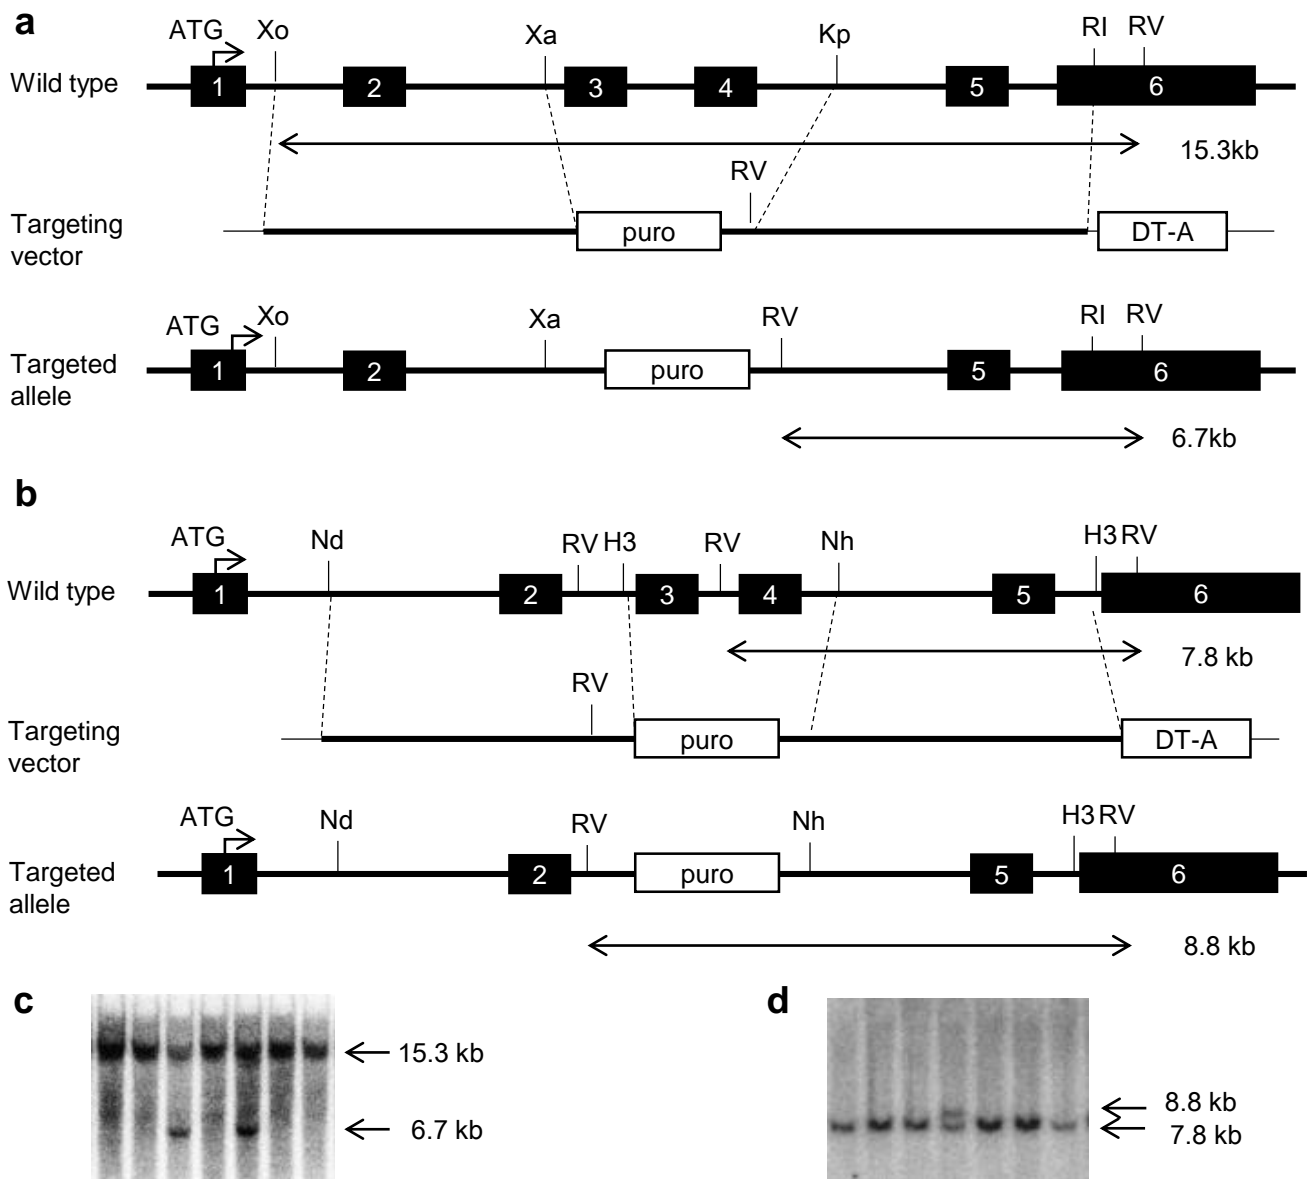

**Supplementary Figure 1.** Targeting of the *Mob1a* and *Mob1b* loci. **a, b** Schematic representation of the *Mob1a* and *Mob1b* loci, the targeting vector, and the targeted loci are shown. Exon 1~6, translation start site (ATG), puromycin cassette (puro), diphtheria toxin A chain gene (DT-A), and restriction sites (Xo, XhoI; Xa, XbaI; Kp, KpnI; RI, EcoRI; RV, EcoRV; Nd, NdeI; H3, HindIII; Nh, NheI) are shown. **c** Southern blot analysis of a representative *Mob1a*<sup>+/*puro*</sup> ES cell clones is shown. For XhoI/EcoRV digestion, the bands representing wild-type and mutant alleles are ~15.3 kb and ~6.7 kb, respectively. **d** Southern blot analysis of a representative *Mob1b*<sup>+/*puro*</sup> ES cell clones is shown. For EcoRV digestion, the bands representing wild-type and mutant alleles are ~7.8 kb and ~8.8 kb, respectively.

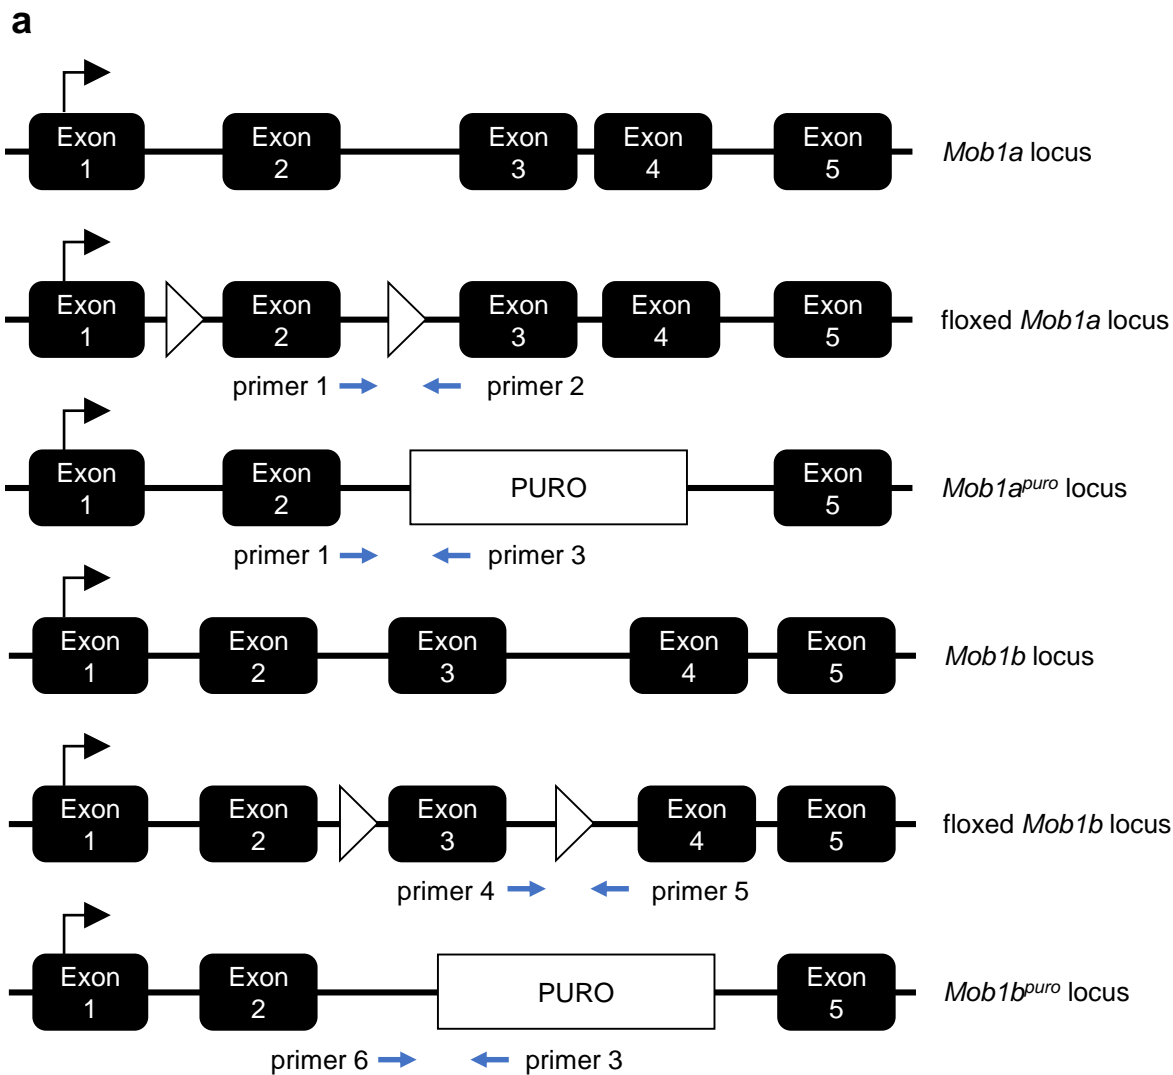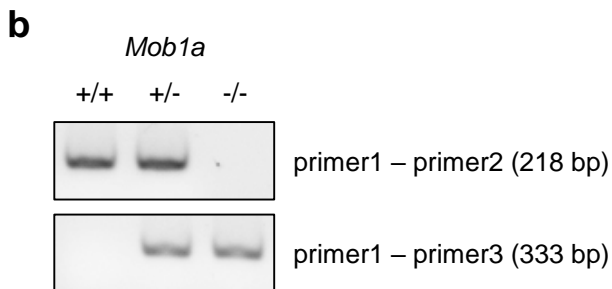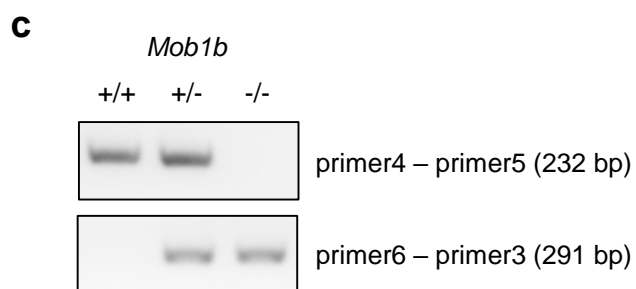

**Supplementary Figure 2.** Generation of *Mob1a/b* knockout mice. **a** Schematic diagram of generation of *Mob1a/b* conventional and conditional knockout mice. **b, c** Genotyping of *Mob1a<sup>puro</sup>* and *Mob1b<sup>puro</sup>* alleles.

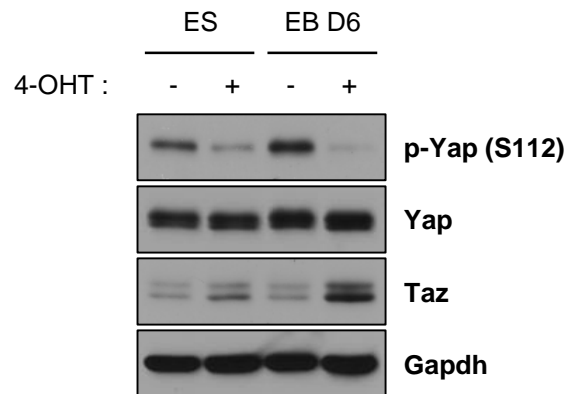

**Supplementary Figure 3.** Immunoblot analysis for phospho-Yap (S112), Yap and Taz in lysates from *Mob1a<sup>-/-</sup> : Mob1b<sup>ff</sup> : CAGGCre-ER<sup>TM</sup>* mouse ESCs and EBs. Gapdh served as a loading control. ES, undifferentiated ESCs; EB D6, EB after 6-day culture (in cell and tissue culture dish).

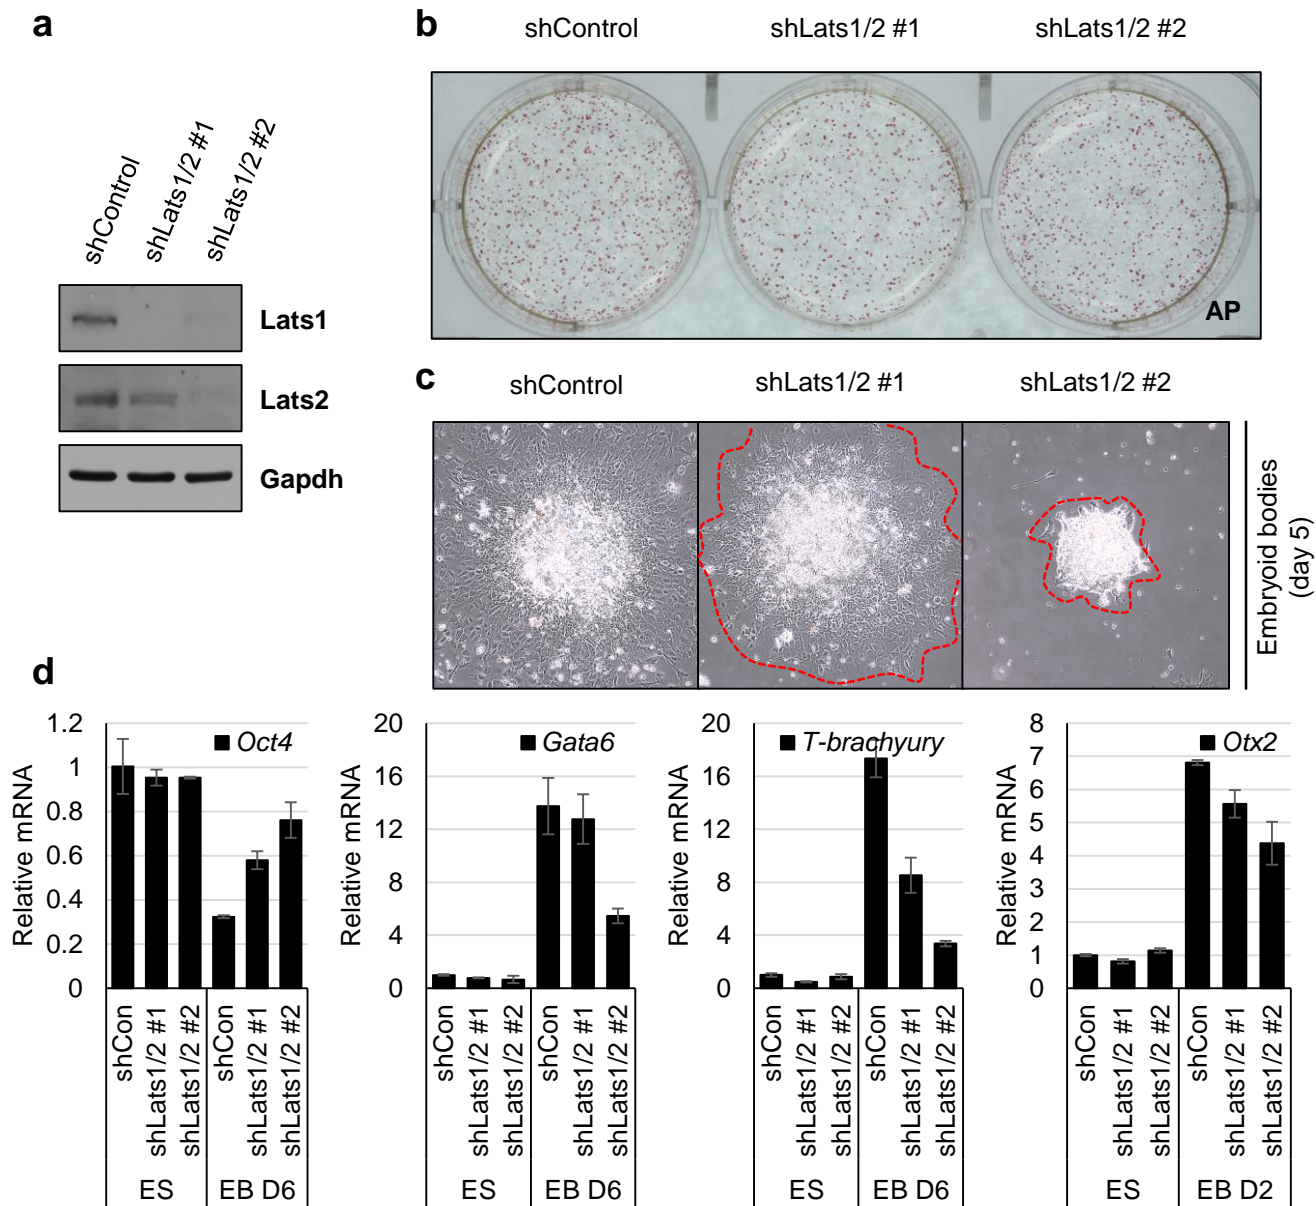

**Supplementary Figure 4.** **a** Immunoblot analysis for Lats1 and Lats2 in lysates from shLats1/2 #1 (#2 target sequence of Lats1 and #2 target sequence of Lats2) and #2 (#3 target sequence of Lats1 and #3 target sequence of Lats2) mouse ESCs described in Materials and Methods. **b** Colony formation and alkaline phosphatase staining of shLats1/2 ESCs. **c** Representative images of EB outgrowth on cell/tissue culture dishes on the day 5 after EB formation. **d** RT-qPCR for *Oct4*, *Gata6*, *T-brachyury6*, and *Otx2* in mESCs and EBs. ES, undifferentiated ESCs; EB D2, EBs after 2-day culture (hanging drop stage); EB D6, EBs after 6-day culture (in cell/tissue culture dish).

**a**

|       |   |    |    |    |    |    |    |   |
|-------|---|----|----|----|----|----|----|---|
| shCon | + | -  | -  | -  | -  | -  | -  | - |
| shYAP | - | -  | -  | -  | +  | +  | +  | + |
| shTAZ | - | #1 | #2 | #3 | #1 | #2 | #3 | - |

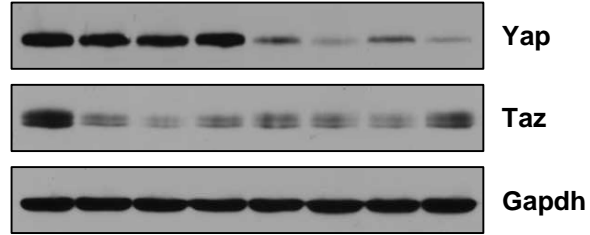**b**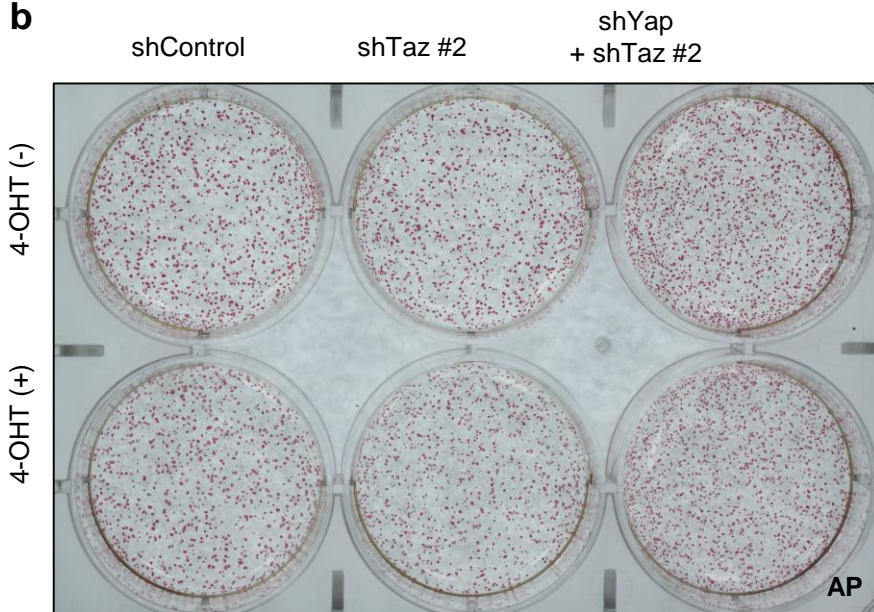**c**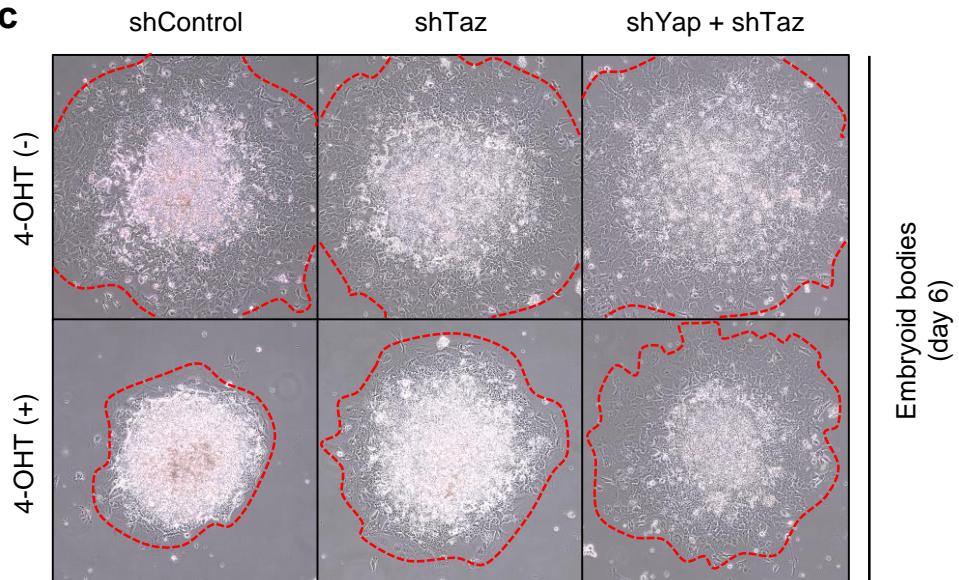

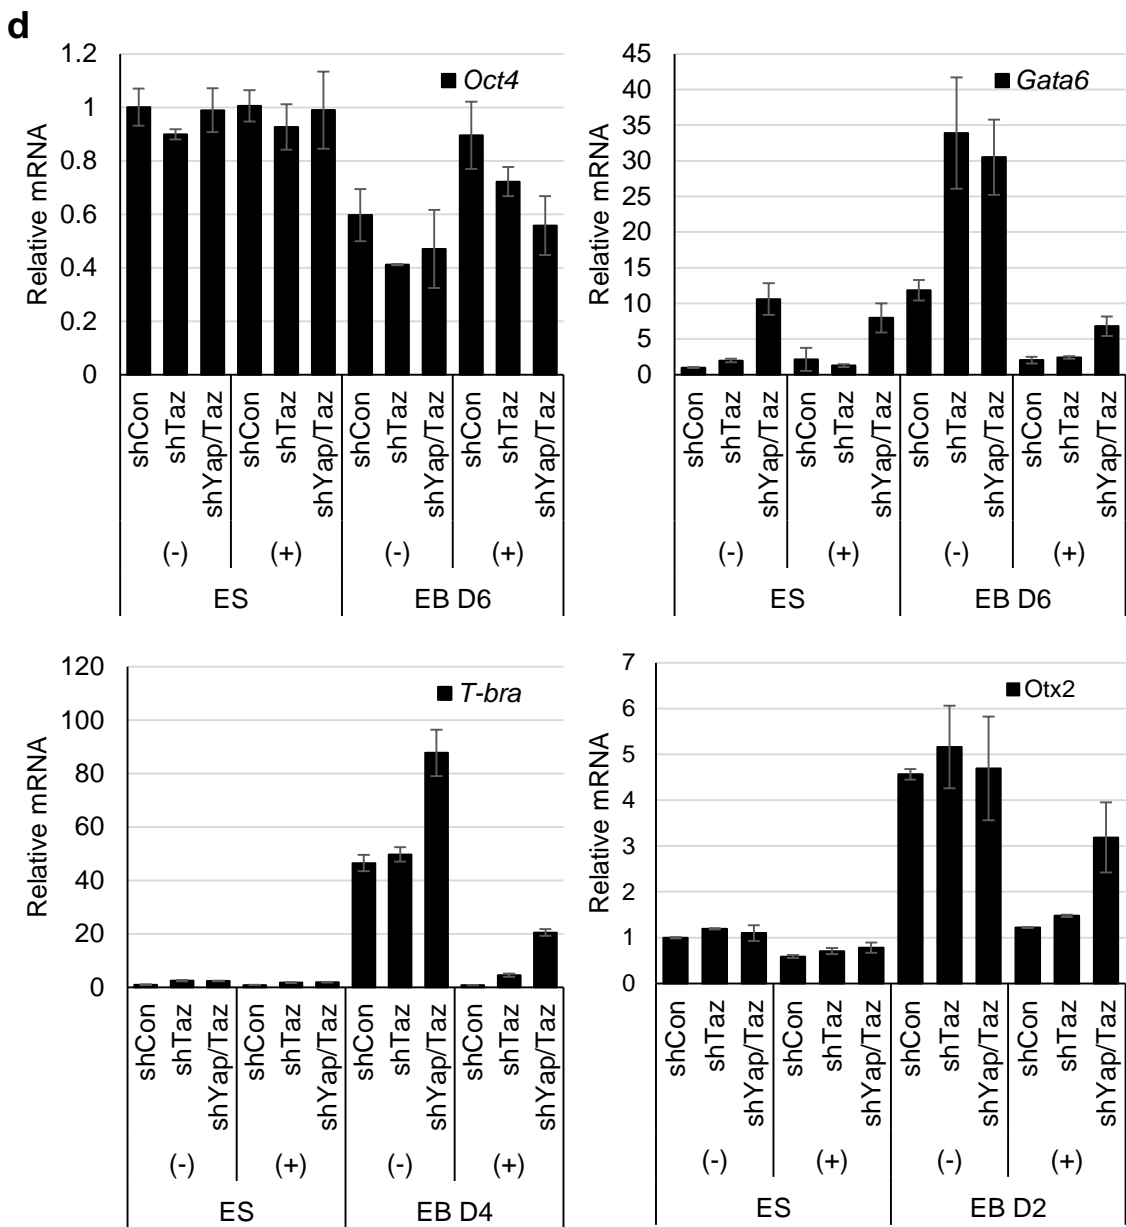

**Supplementary Figure 5. a** Immunoblot analysis for Yap and Taz in lysates from *Mob1a<sup>ff</sup>: Mob1b<sup>ff</sup>: CAGGCre-ER<sup>TM</sup>* mouse ESCs. **b** Colony formation and alkaline phosphatase staining of shTaz and shYap/Taz ESCs. **c** Representative images of EB outgrowth on tissue culture dishes on the day 5 after EB formation. **d** RT-qPCR for *Oct4*, *Gata6*, *T-brachyury*, and *Otx2* in mESCs and EBs. ES, undifferentiated ESCs; EB D2, EBs after 2-day culture (hanging drop stage); EB D4, EBs after 4-day culture (in bacteriological grade Petri dish); EB D6, EBs after 6-day culture (in cell/tissue culture dish).

| <b>Antibody</b>                              | <b>Manufacturer</b>      | <b>Order number</b> |
|----------------------------------------------|--------------------------|---------------------|
| Rabbit polyclonal against Mob1a/b            | Cell signaling           | #3863               |
| Mouse monoclonal against Oct4                | Santa Cruz Biotechnology | sc-5279             |
| Goat polyclonal against Nanog                | Santa Cruz Biotechnology | sc-30328            |
| Rabbit polyclonal against YAP                | Cell signaling           | #4912               |
| Rabbit polyclonal against phospho-YAP (S127) | Cell signaling           | #4911               |
| Rabbit polyclonal against TAZ                | Sigma                    | HPA007415           |
| Rabbit polyclonal against Lats1              | Abcam                    | ab70561             |
| Rabbit polyclonal against Lats2              | Abcam                    | ab135794            |
| Mouse polyclonal against GAPDH               | Santa Cruz Biotechnology | sc-32233            |
| Goat anti-mouse IgG conjugated HRP           | GenDEPOT                 | SA001-500           |
| Goat anti-rabbit IgG conjugated HRP          | GenDEPOT                 | SA002-500           |
| Rabbit anti-goat IgG conjugated HRP          | GenDEPOT                 | SA007-500           |

**Supplementary Table 1.** Primary antibodies for immunoblotting and immunohistochemistry.



| <b>Gene</b>        | <b>Forward primer (5' to 3')</b> | <b>Reverse primer (5' to 3')</b>  |
|--------------------|----------------------------------|-----------------------------------|
| <i>Mob1a</i>       | TCG GAA GTG GCA ATC TGA GG       | CAG CTT GCC TCA GTG CAG AA        |
| <i>Mob1b</i>       | CTA CGG ATG GCT GTC ATG CT       | GAC ATC ACC GGA CAG CTC TC        |
| <i>Oct4</i>        | TTG GGC TAG AGA AGG ATG TGG TT   | GGA AAA GGG ACT GAG TAG AGT GTG G |
| <i>Sox2</i>        | GCA CAT GAA CGG CTG GAG CAA CG   | TGC TGC GAG TAG GAC ATG CTG TAG G |
| <i>Nanog</i>       | AAC CTT TTC AGA AAT CCC TTC C    | GAG GCA GGT CTT CAG AGG AA        |
| <i>Gata6</i>       | GCT GAA CGG AAC GTA CCA CC       | ACA GTG GCG TCT GGA TGG AG        |
| <i>Gata4</i>       | CCT GGA AGA CAC CCC AAT CTC      | AGG TAG TGT CCC GTC CCA TCT       |
| <i>Sox17</i>       | AAA GCG GAG TCT CGC ATC C        | CGC TTC TCT GCC AAG GTC AA        |
| <i>FoxA1</i>       | CAA GGA TGC CTC TCC ACA CTT      | TGA CCA TGA TGG CTC TCT GAA       |
| <i>Pdgfra</i>      | TCC ATG CTA GAC TCA GAA GTC A    | TCC CGG TGG ACA CAA TTT TTC       |
| <i>Hand1</i>       | TCG CCT ACT TGA TGG ACG TG       | GGC CTG GTC TCA CTG GTT TA        |
| <i>T-brachyury</i> | CAC CGC TGG AAA TAT GTG AA       | CAC GAT GTG AAT CCG AGG TT        |
| <i>Twist2</i>      | CAG TGA GGA AGA GCT GGA GAG G    | CTG GAT CTT GCT GAG CTT GTC A     |
| <i>FoxA2</i>       | AGC ACC ATT ACG CCT TCA AC       | CCT TGA GGT CCA TTT TGT GG        |
| <i>MixL1</i>       | CGT CTT CCG ACA GAC CAT GT       | GTT CTG GAA CCA CAC CTG GAT       |
| <i>Fgf5</i>        | GCC TGT CCT TGC TCT TCC TCA T    | GGA GAA GCT GCG ACT GGT GA        |
| <i>Otx2</i>        | GCG AAG GGA GAG GAC GAC ATT T    | CTG CTG TTG GCG GCA CTT AG        |
| <i>Sox1</i>        | GCC GAG TGG AAG GTC ATG TC       | TTG AGC AGC GTC TTG GTC TTG       |
| <i>Pax6</i>        | ACC AGT GTC TAC CAG CCA ATC C    | GCA CGA GTA TGA GGA GGT CTG A     |
| <i>Eomes</i>       | CCA CCG CCC ACT ACA ATG TT       | CCC AAA GGA AAT CTC CTG CCT       |
| <i>Nestin</i>      | GCT GGA ACA GAG ATT GGA AGG      | CCA GGA TCT GAG CGA TCT GAC       |
| <i>Gapdh</i>       | TGT CGT GGA GTC TAC TGG TGT C    | GCT AAG CAG TTG GTG GTG CAG G     |

**Supplementary Table 2.** Primer sequences used for quantitative or semiquantitative PCR.

| <b>Sequences (5' to 3')</b> |                               |
|-----------------------------|-------------------------------|
| Primer 1                    | CCTCGTCGTCTGGATCTAGC          |
| Primer 2                    | CCAGCATACTGAAGAC CACTC        |
| Primer 3                    | GCTACTTCCATTTGTCACGTCCTGCACGA |
| Primer 4                    | CCATCTCTTCAGCCTCCCTTCTTG      |
| Primer 5                    | GAGCTTAGTGCTAGAGAGATGAC       |
| Primer 6                    | ATGTCTTCTTGCTCTCTAA TAC       |

**Supplementary Table 3.** Primer sequences for genotyping of *Mob1a/b* alleles shown in Supplementary Figure 2.
